# Supplementary material for: Variation in Gene Expression between Two Sorghum bicolor Lines Differing in Innate Immunity Response
Source: MDPI journal article supplement (doi:10.3390/plants10081536), 2021-07-27
Supplement: s1 [file s1]

Table S1. qRT-PCR primers used in this study

| Name                 | Gene                                  | Sequence (5'-3')      | Primer set                 |
|----------------------|---------------------------------------|-----------------------|----------------------------|
| SORBI_3006G217900_F1 | SORBI_3006G217900                     | GCAAGTTCTTGGCACTCCTG  | Primer set 1               |
| SORBI_3006G217900_R1 | SORBI_3006G217900                     | ACCGTCCTCATGTACGCAAA  | Primer set 1               |
| SORBI_3006G217900_F2 | SORBI_3006G217900                     | TGGCACTCCTGCTAAAAACG  | Primer set 2               |
| SORBI_3006G217900_R2 | SORBI_3006G217900                     | CACCGTCCTCATGTACGCAA  | Primer set 2               |
| SORBI_3002G260900_F1 | SORBI_3002G260900                     | CGCTGGGAAGATCGATGTCA  | Primer set 1               |
| SORBI_3002G260900_R1 | SORBI_3002G260900                     | TTCCCAGAGCGGATAGGTGA  | Primer set 1               |
| SORBI_3002G260900_F2 | SORBI_3002G260900                     | ATTGATCCAAGGCTAGGCGG  | Primer set 2               |
| SORBI_3002G260900_R2 | SORBI_3002G260900                     | AGGTCTCATCCTGGGCTCTT  | Primer set 2               |
| SORBI_3004G052500_F1 | SORBI_3004G052500                     | CTGGTGCAGCTACATTTGCC  | Primer set 1               |
| SORBI_3004G052500_R1 | SORBI_3004G052500                     | TCCTTCAGTACCGAACGCAC  | Primer set 1               |
| SORBI_3004G052500_F2 | SORBI_3004G052500                     | CGATGACGGGAGCCAAGATT  | Primer set 2               |
| SORBI_3004G052500_R2 | SORBI_3004G052500                     | GAGTGCAAACCCAGCCATTG  | Primer set 2               |
| SORBI_3006G261500_F1 | SORBI_3006G261500                     | AGACGGTGAAAGTGCGTGAT  | Primer set 1               |
| SORBI_3006G261500_R1 | SORBI_3006G261500                     | TAGATGGGGGTGCCTCTCAA  | Primer set 1               |
| SORBI_3006G261500_F2 | SORBI_3006G261500                     | ATTGTCATCGGTGGTGGCAT  | Primer set 2               |
| SORBI_3006G261500_R2 | SORBI_3006G261500                     | TATGAACACGCCCCGCCAATA | Primer set 2               |
| SORBI_3007G120401_F1 | SORBI_3007G120401                     | TCCGGAGGAAGACATGGGTC  | Primer set 1               |
| SORBI_3007G120401_R1 | SORBI_3007G120401                     | CGGAGTGACAGATACCCAGC  | Primer set 1               |
| SORBI_3007G120401_F2 | SORBI_3007G120401                     | GGGCAAACCCTTCTCTTCTCA | Primer set 2               |
| SORBI_3007G120401_R2 | SORBI_3007G120401                     | AGTGCTTGACCCATGTCTTCC | Primer set 2               |
| SORBI_3007G074200_F1 | SORBI_3007G074200                     | TCCATCCACCCACAGTTTGC  | Primer set 1               |
| SORBI_3007G074200_R1 | SORBI_3007G074200                     | GTAGCCTGCTTGGTAGCTCA  | Primer set 1               |
| SORBI_3007G074200_F2 | SORBI_3007G074200                     | TCCATCCATCCACCCACAGT  | Primer set 2               |
| SORBI_3007G074200_R2 | SORBI_3007G074200                     | GTAGCCTGCTTGGTAGCTCAT | Primer set 2               |
| SORBI_3008G191300_F1 | SORBI_3008G191300                     | AACTTCATCGACGGGCTCTG  | Primer set 1               |
| SORBI_3008G191300_R1 | SORBI_3008G191300                     | ACATCTCGATGTGCCGATCC  | Primer set 1               |
| SORBI_3008G191300_F2 | SORBI_3008G191300                     | CAACTTCATCGACGGGCTCT  | Primer set 2               |
| SORBI_3008G191300_R2 | SORBI_3008G191300                     | GGACATCTCGATGTGCCGAT  | Primer set 2               |
| SORBI_3010G117800_F1 | SORBI_3010G117800                     | AGGTGACTGCGTTCGCTGA   | Primer set 1               |
| SORBI_3010G117800_R1 | SORBI_3010G117800                     | TCGACAACGCTAAGCCAGA   | Primer set 1               |
| SORBI_3010G117800_F2 | SORBI_3010G117800                     | AACCGAGAGACGGGGTTC    | Primer set 2               |
| SORBI_3010G117800_R2 | SORBI_3010G117800                     | AGTCACCTCAGAGGCATAGG  | Primer set 2               |
| SORBI_3003G036200_F1 | SORBI_3003G036200                     | CAGCACCTACAGGAAGACCG  | Primer set 1               |
| SORBI_3003G036200_R1 | SORBI_3003G036200                     | TGTAACCGCTTGCGACAGAG  | Primer set 1               |
| SORBI_3003G036200_F2 | SORBI_3003G036200                     | CTACAGGAAGACCGTGCGGAG | Primer set 2               |
| SORBI_3003G036200_R2 | SORBI_3003G036200                     | CCGCTTGCGACAGAGGTG    | Primer set 2               |
| SORBI_3004G039400-F  | SORBI_3004G039400<br>( <i>EIF4α</i> ) | TCCTGTCGCTGTGTACCTTCT | reference gene<br>primer 1 |
| SORBI_3004G039400-R  | SORBI_3004G039400<br>( <i>EIF4α</i> ) | GATGGGAGGTATGTAGCATCG | reference gene<br>primer 2 |
